# Supplementary material for: Response and recovery of a Sphagnum peatland from long-term human-induced alkalinisation
Source: Copernicus journal article supplement (doi:10.5194/egusphere-2025-1351), 2025-04-17
Supplement: Supplementary file 1 [file egusphere-2025-1351-supplement.pdf]

**Supplementary materials for manuscript “Response and recovery of a Sphagnum peatland from long-term human-induced alkalinisation”.**

**Supplementary figures:**

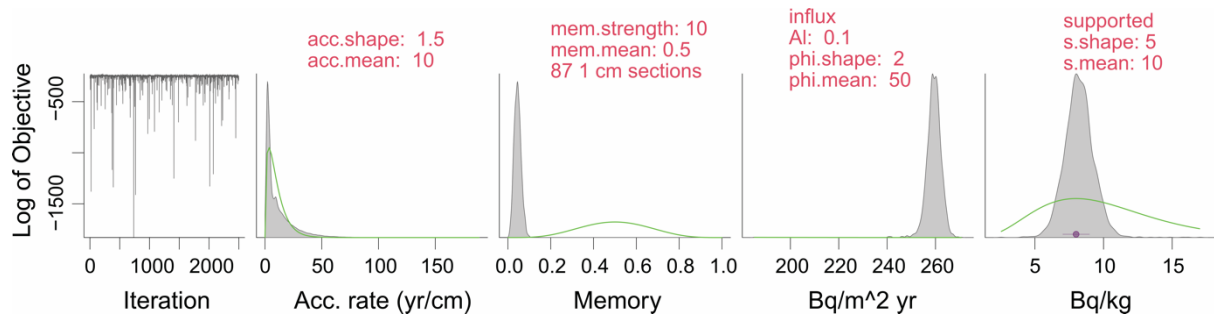

**Supplementary Figure 1.** Age-depth model diagnostic parameters from rPlum.

**Supplementary Table 1.**

Blank and reference samples (IAEA 447, IAEA 385) processed with research material to ensure the analyses' quality and accuracy when measuring  $^{210}\text{Pb}$  and  $^{239+240}\text{Pu}$  activity.

| Reference material<br>(the reference date) | 210Pb activity concentration<br>(Bq kg-1) |              | 239+240Pu activity concentration<br>(Bq kg-1) |                 |
|--------------------------------------------|-------------------------------------------|--------------|-----------------------------------------------|-----------------|
|                                            | measured                                  | certified    | measured                                      | certified       |
| IAEA 385 (2019-01-01)                      | not analysed                              |              | $3.34 \pm 0.25$                               | $2.98 \pm 0.26$ |
| IAEA 447 (2009-11-15)                      | $419 \pm 10$                              | $420 \pm 20$ | $5.45 \pm 0.28$                               | $5.30 \pm 0.20$ |
